# Supplementary material for: Aptamer mediated niosomal drug delivery
Source: Royal Society of Chemistry journal article supplement (doi:10.1039/c6ra19525c), 2016-01-01
Supplement: c6ra19525c1.pdf [file c6ra19525c1.pdf]

Electronic Supplementary Information

RSC Advances

**Aptamer-Mediated Niosomal Drug Delivery**

**Didem Ag Seleci,<sup>a</sup> Muharrem Seleci,<sup>a</sup> André Jochums,<sup>a</sup> Johanna-Gabriela Walter,<sup>a</sup> Frank Stahl,<sup>a\*</sup> and Thomas Scheper<sup>a</sup>**

<sup>a</sup>Leibniz University Hannover, Institute for Technical Chemistry, 30167 Hannover/Germany

\*Corresponding author. Leibniz University Hannover, Institute for Technical Chemistry, 30167 Hannover/Germany

Phone: +49 511 762 2968 ; Fax: +49 511 762 3004

E-mail address: [stahl@iftc.uni-hannover.de](mailto:stahl@iftc.uni-hannover.de)

## Figures

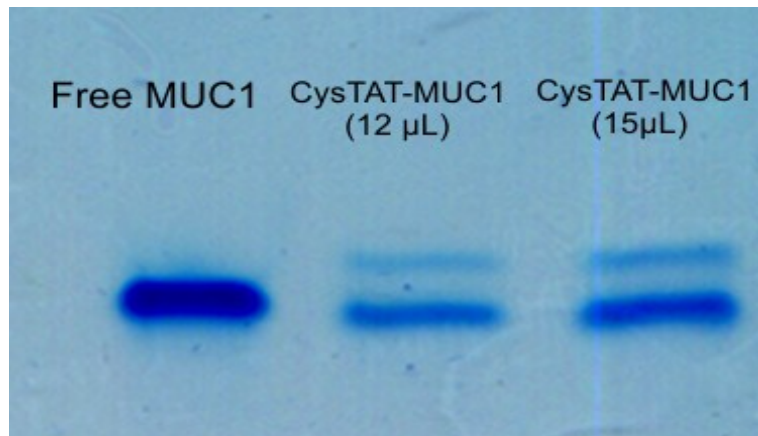

**Figure S1.** Confirmation of conjugation of MUC1 aptamer with CysTAT peptide (Urea PAGE)

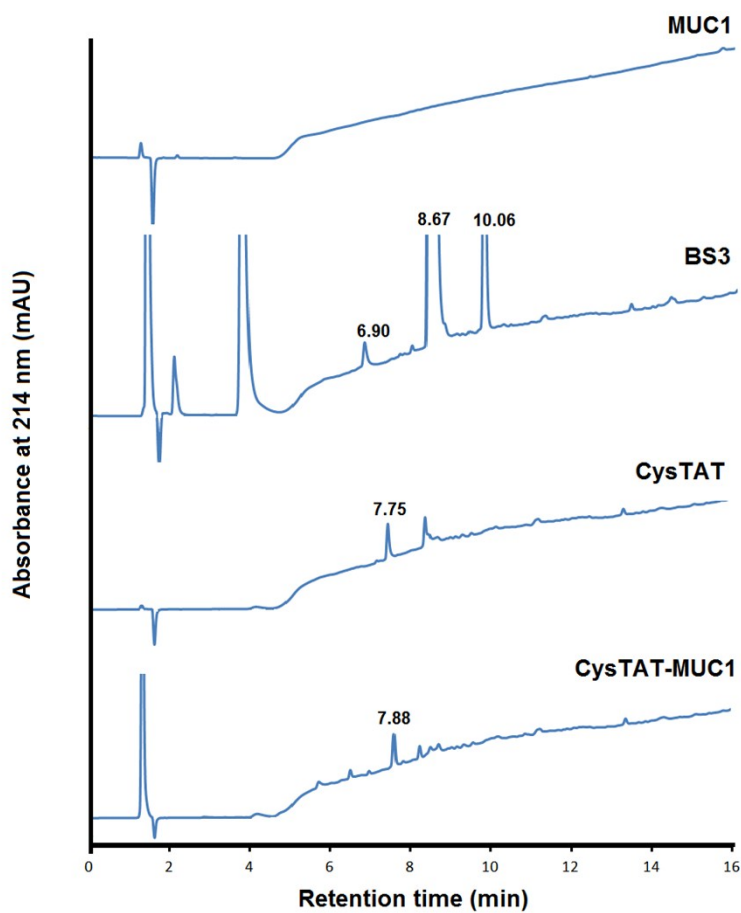

**Figure S2.** HPLC chromatogram of MUC1 aptamer, BS3 crosslinker, CysTAT peptide and CysTAT-MUC1 conjugate.
